# Supplementary material for: Cytotoxic and apoptotic effects of ternary silver(i) complexes bearing 2-formylpyridine thiosemicarbazones and 1,10-phenanthroline
Source: Royal Society of Chemistry journal article supplement (doi:10.1039/d0dt00253d), 2020-01-01
Supplement: d0dt00253d1.pdf [file d0dt00253d1.pdf]

## Electronic Supplementary Information (ESI)

### Cytotoxic and apoptotic effects of ternary silver(I) complexes bearing 2-formylpyridine thiosemicarbazones and 1,10-phenanthroline

Débora E. S. Silva,<sup>a</sup> ✉ Amanda B. Becceneri,<sup>b</sup> Mariana C. Solcia,<sup>c</sup> João V. B. Santiago,<sup>a</sup> Mariete B. Moreira,<sup>a</sup> José A. Gomes Neto,<sup>a</sup> Fernando R. Pavan,<sup>c</sup> Márcia R. Cominetti,<sup>b</sup> José C. M. Pereira<sup>a</sup> and Adelino V. G. Netto<sup>a</sup> ✉

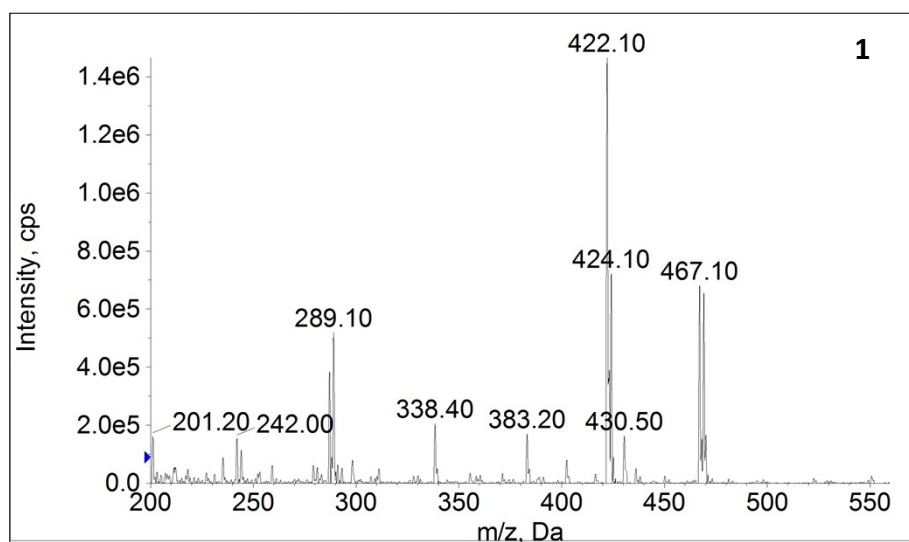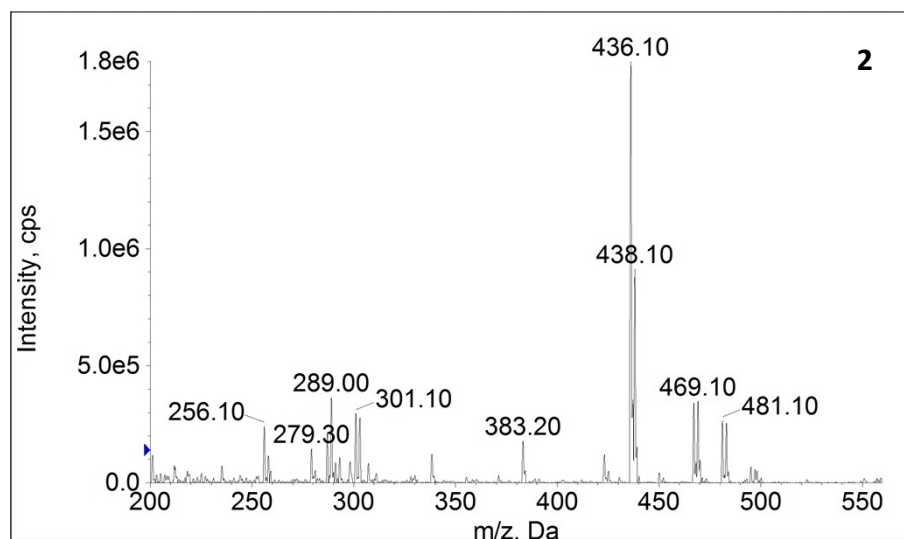

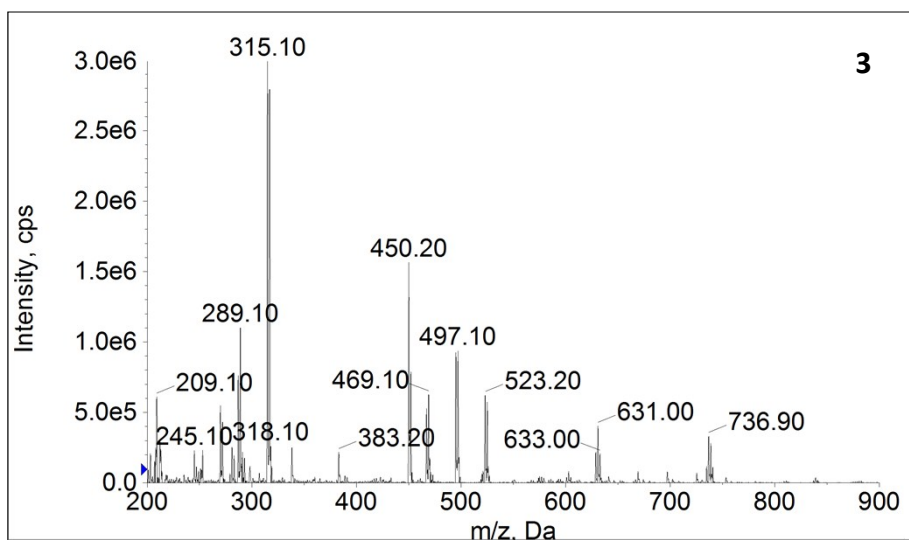

**Fig. S1.** ESI-MS spectra of compounds 1-3.

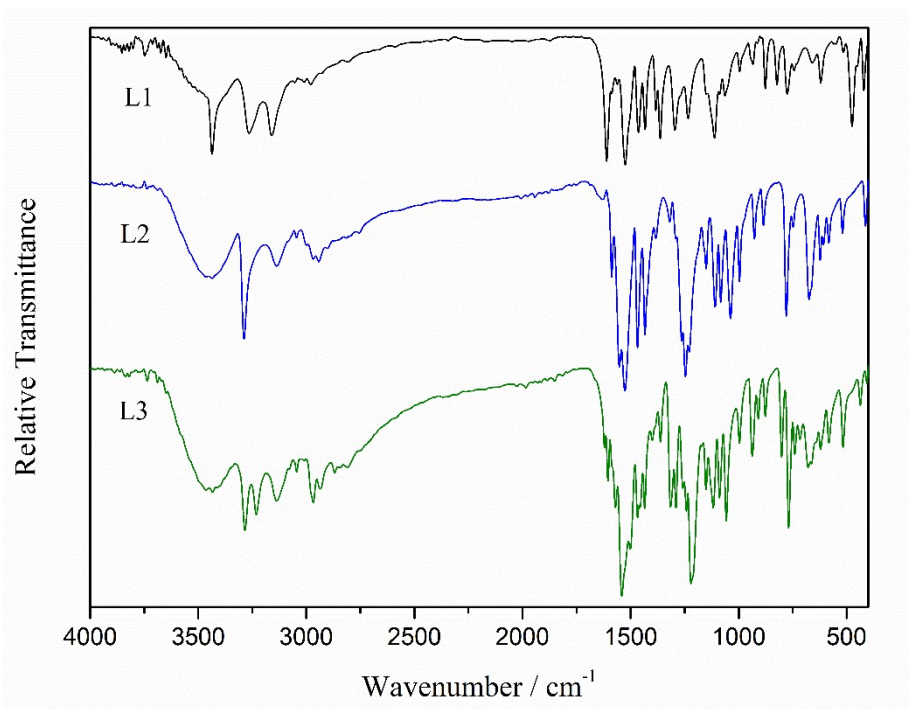

**(A)**

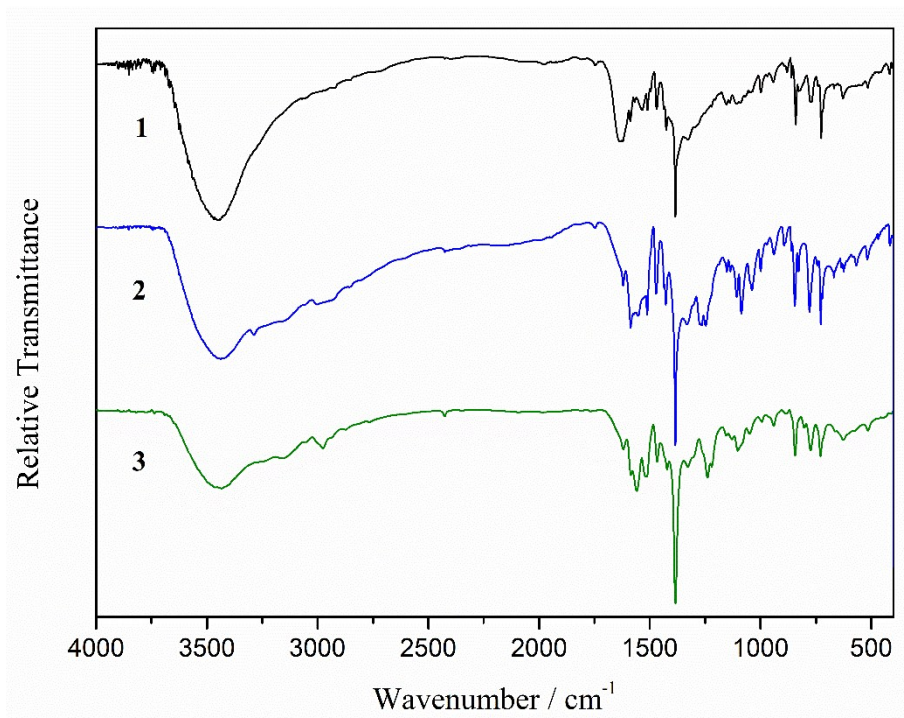

(B)

Fig. S2. IR spectra of ligands L1-L3 (A) and compounds 1-3 (B).

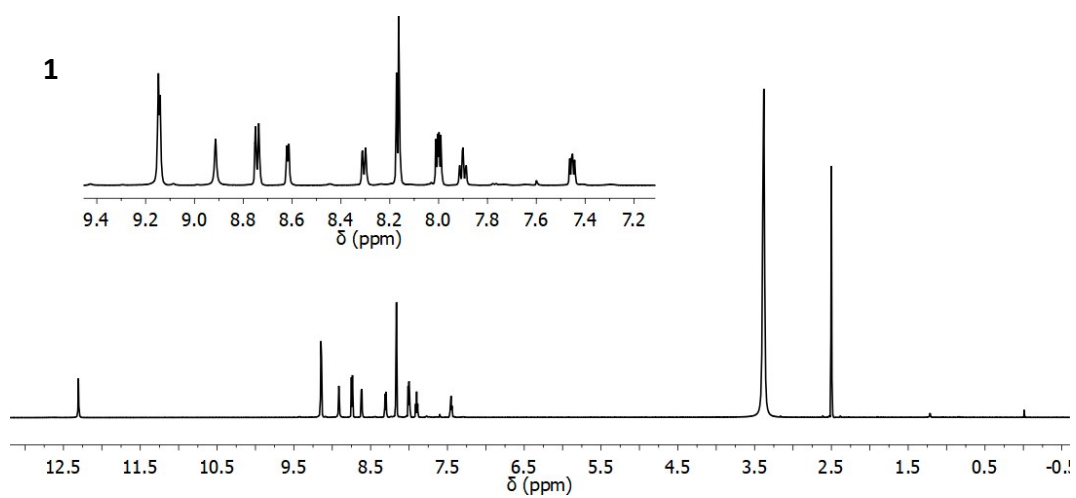

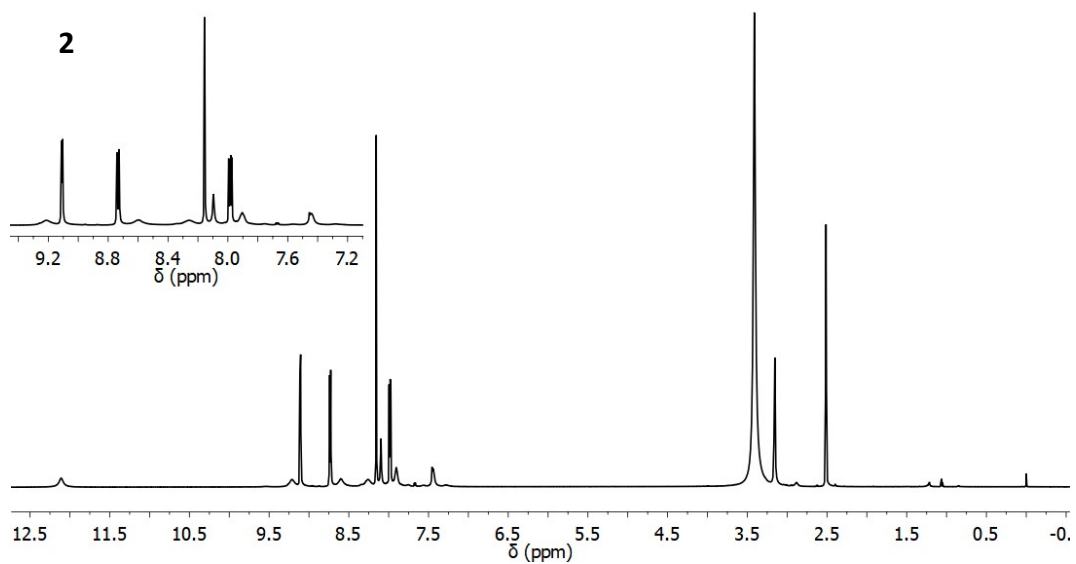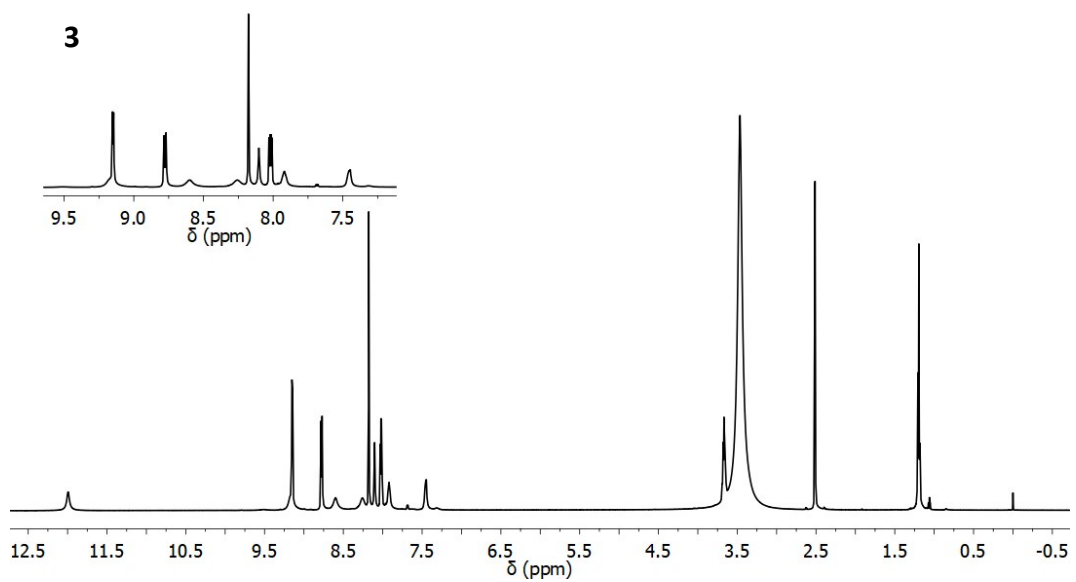

**Fig. S3.**  $^1\text{H}$  NMR spectra of compounds **1-3** in  $\text{DMSO-d}_6$ .

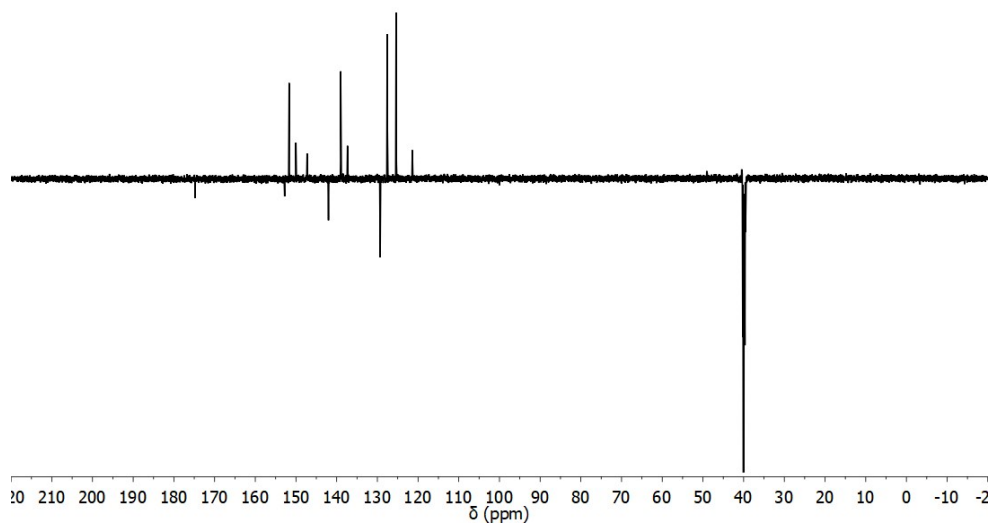

**Fig. S4.**  $^{13}\text{C}$ -DEPTQ NMR spectrum of **1** in  $\text{DMSO-d}_6$ .

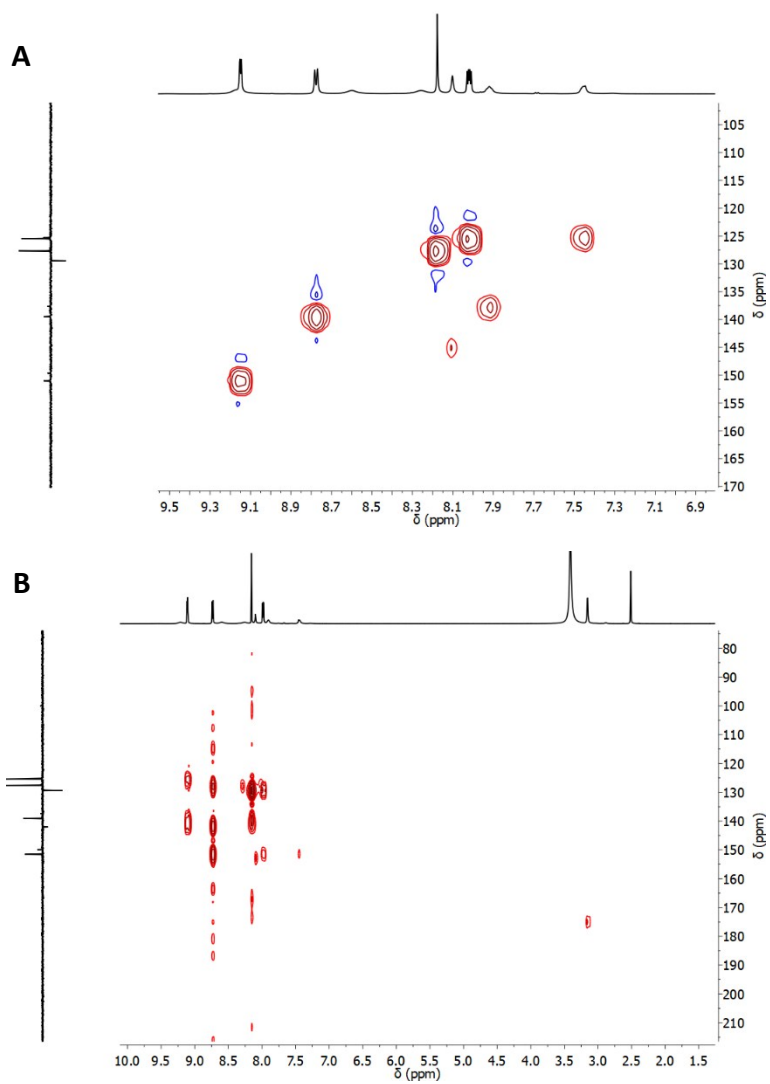

**Fig. S5.**  $^1\text{H}$ - $^{13}\text{C}$  HSQC and HMBC NMR spectra of **2** in  $\text{DMSO-d}_6$ .

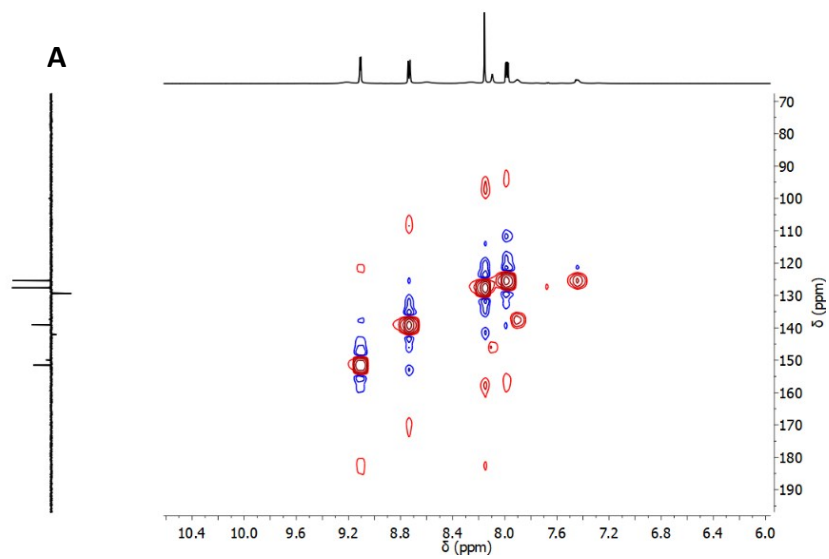

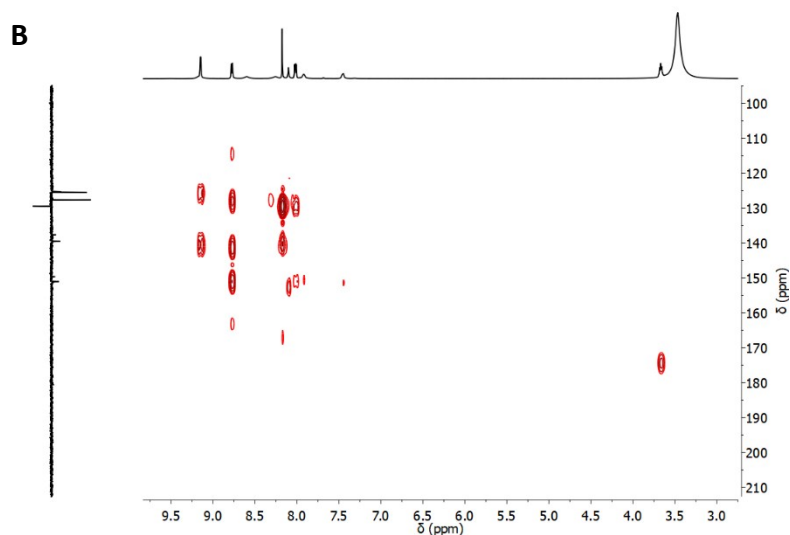

**Fig. S6.**  $^1\text{H}$ - $^{13}\text{C}$  HSQC and HMBC NMR spectra of **3** in  $\text{DMSO-d}_6$ .

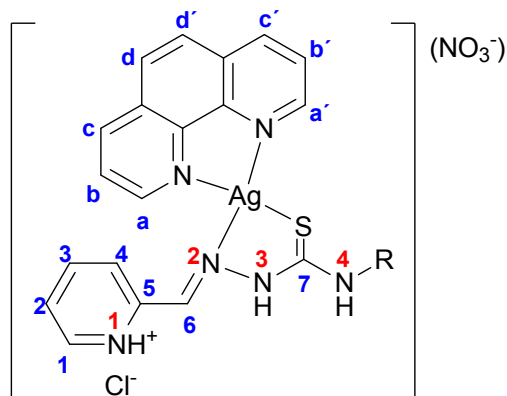

R = H (**1**);  $\text{CH}_3$  (**2**) and  $\text{CH}_2\text{CH}_3$  (**3**)

**Fig. S7.** Numbering scheme for NMR assignments of compounds.

**Table S1.** Selected  $^1\text{H}$  and  $^{13}\text{C}$  NMR chemical shifts for compounds L1-L3 and **1-3**.

| NMR             | $\delta$ (ppm)             |                 |                 |
|-----------------|----------------------------|-----------------|-----------------|
|                 | <b>1 (L1)</b>              | <b>2 (L2)</b>   | <b>3 (L3)</b>   |
| $^3\text{NH}$   | 12.35 (11.80)              | 12.01 (11.70)   | 11.98 (11.75)   |
| $^4\text{NH}$   | 9.16 (8.46)<br>8.93 (8.29) | 9.20 (8.68)     | 9.14 (8.84)     |
| $^{13}\text{C}$ |                            |                 |                 |
| CS              | 174.35 (178.53)            | 175.18 (177.96) | 174.10 (176.89) |

CH=N      146.83 (139.67)      145.85 (141.96)      145.07 (139.94)

---

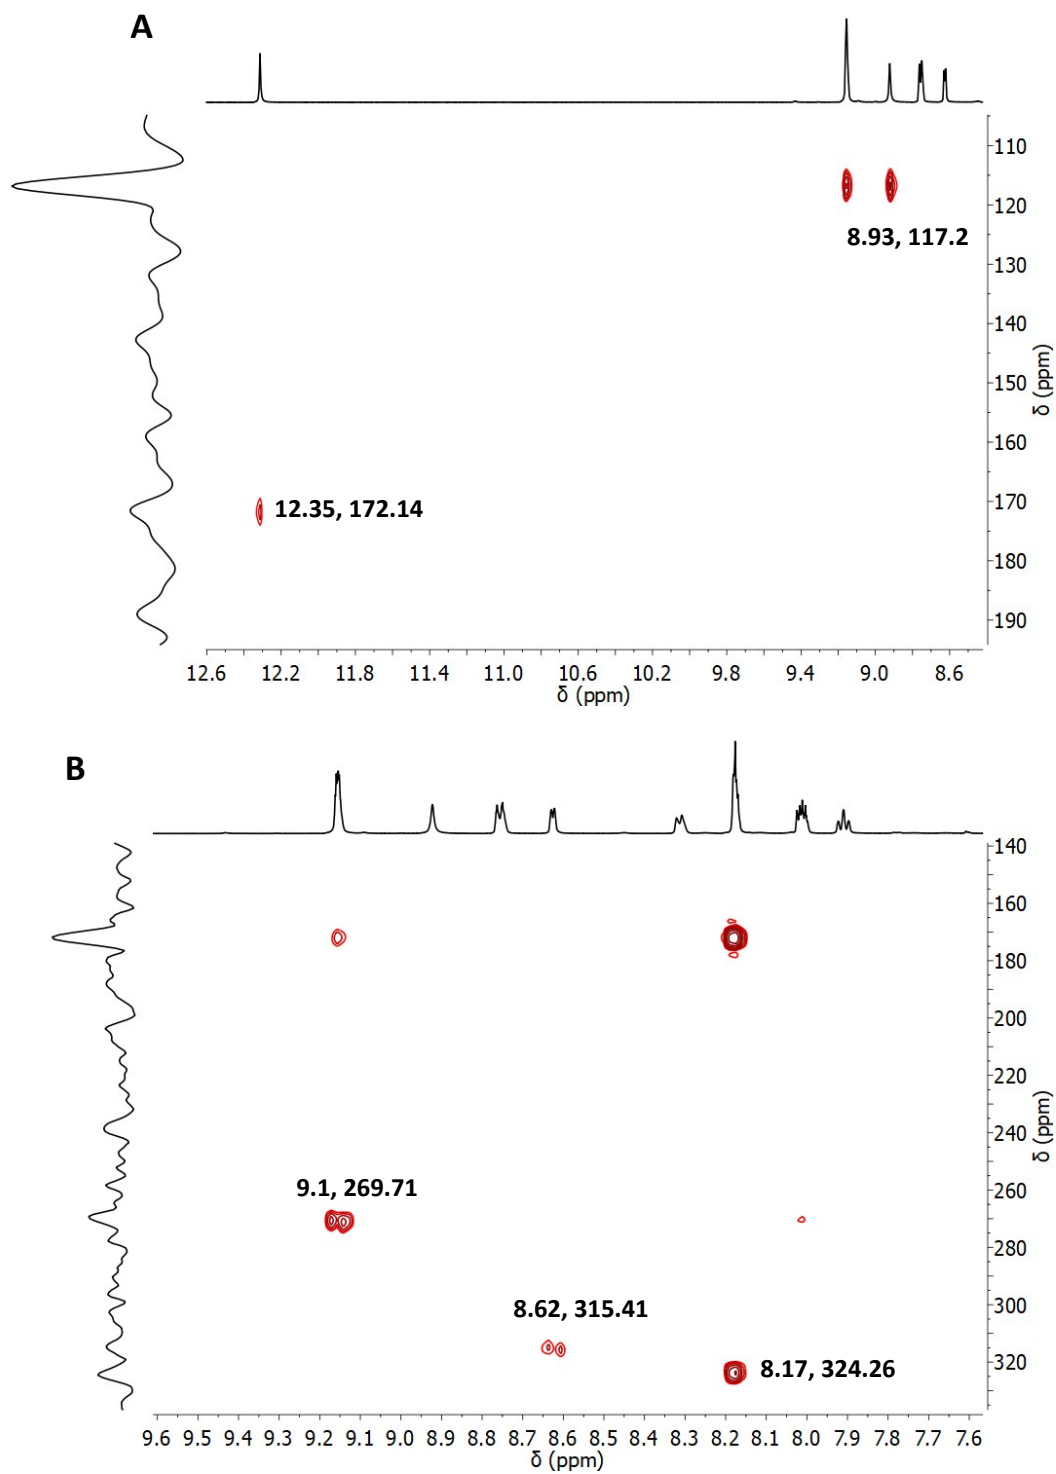

**Fig. S8.**  $^1\text{H}$ - $^{15}\text{N}$  HSQC (A) and HMBC (B) NMR spectra of compound **1** in DMSO- $d_6$ .

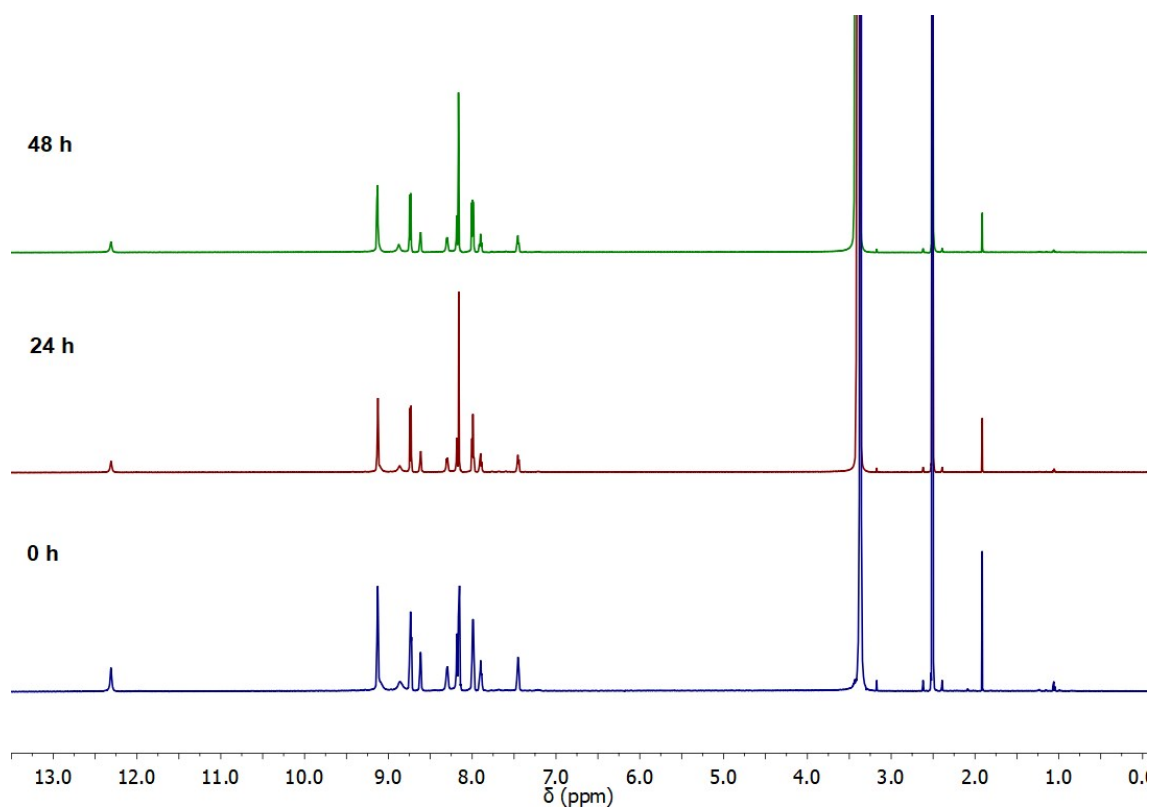

(A)

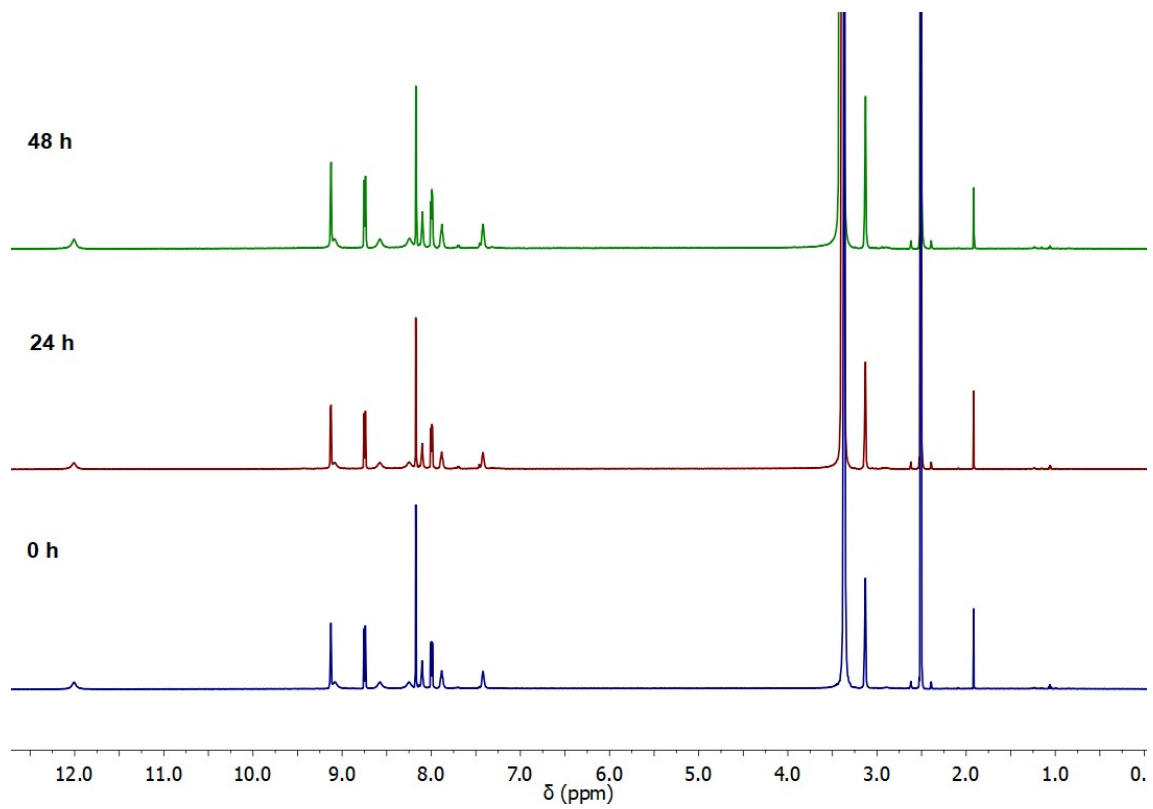

(B)



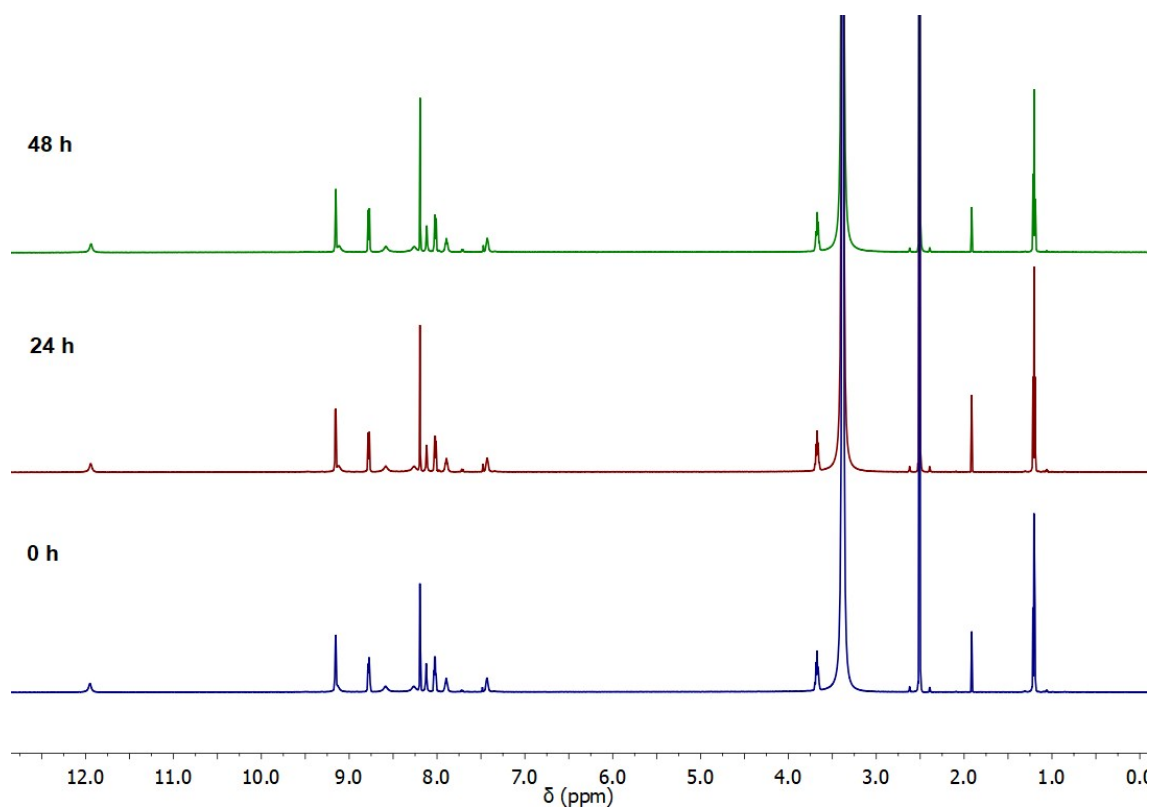

(C)

**Fig. S9.**  $^1\text{H}$  NMR spectra of complexes (A) **1**, (B) **2** and (C) **3** recorded in  $\text{DMSO-d}_6$  over a period of 48 hours.

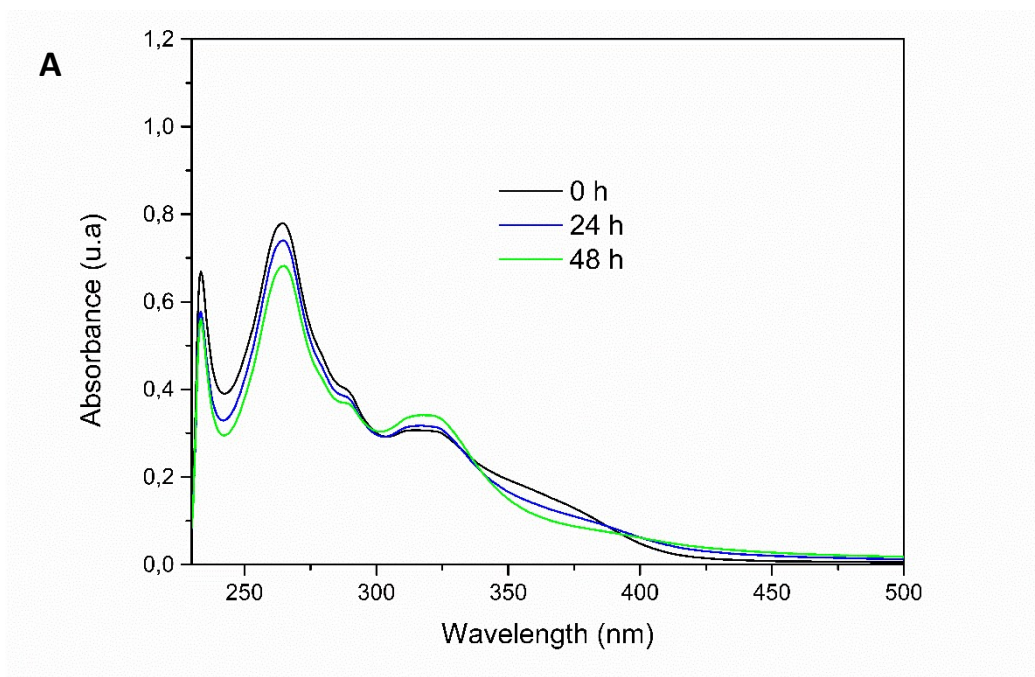

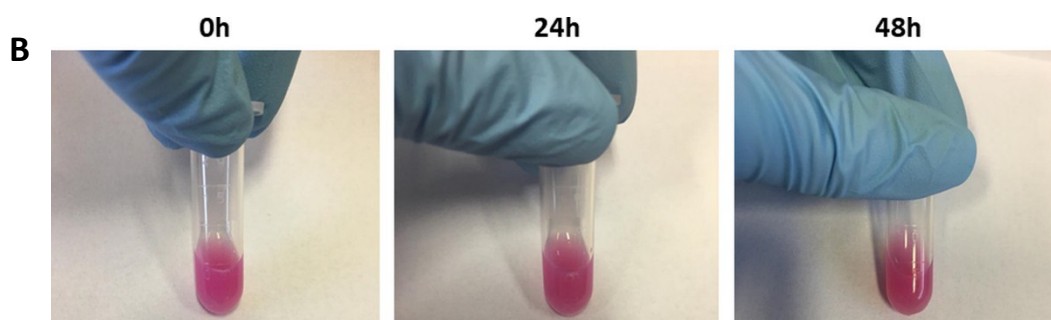

**Fig. S10.** Evaluation of stability of complex **1** in biological medium. **A)** UV-Vis spectrum of **1** recorded in Tris-HCl buffer (pH 7.4; 2% DMSO) over a period of 48 hours. **B)** Images recorded of a solution of **1** ( $1 \text{ mg mL}^{-1}$ , 5% DMSO) in DMEM cell culture medium over a period of 48 hours.

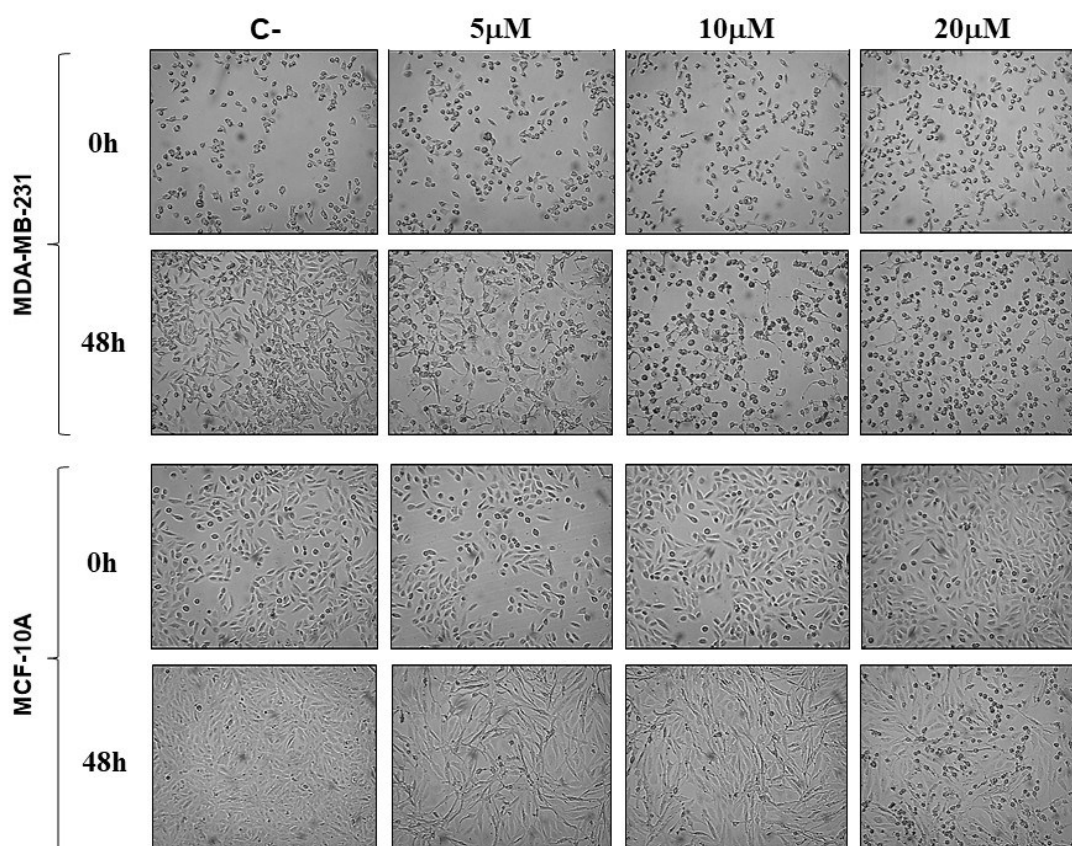

**Fig. S11.** Morphological changes in MDA-MB-231 and MCF-10A cells incubated with compound **1** for 48 hours. Amplification 10 x.

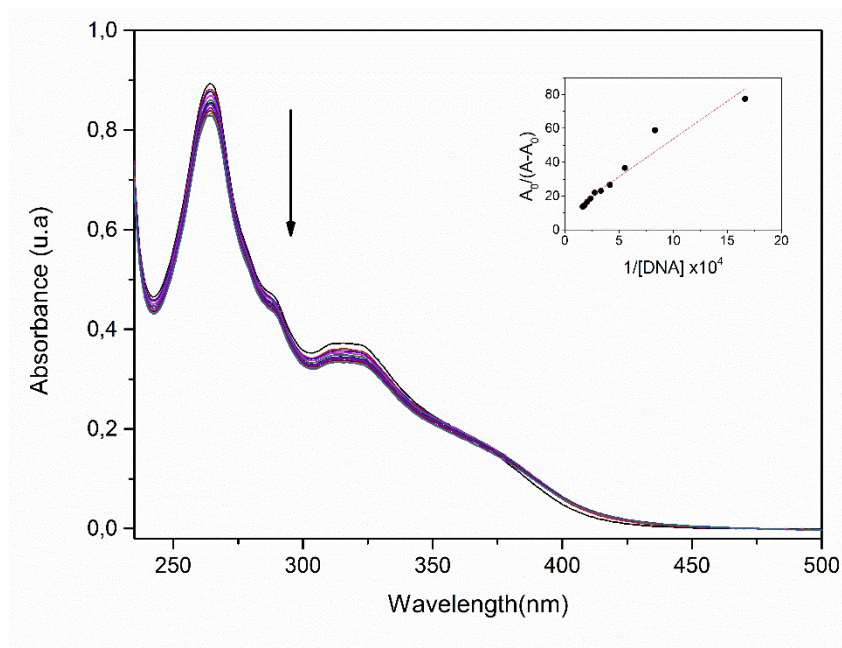

**Fig. S12.** Absorption titration spectra of compound **1** (20 μM) with increasing amounts of ct-DNA solutions (0 - 60 μM) in Tris-HCl buffer. Inset: plot of  $1/[DNA]$  vs.  $A_0/(A-A_0)$ .

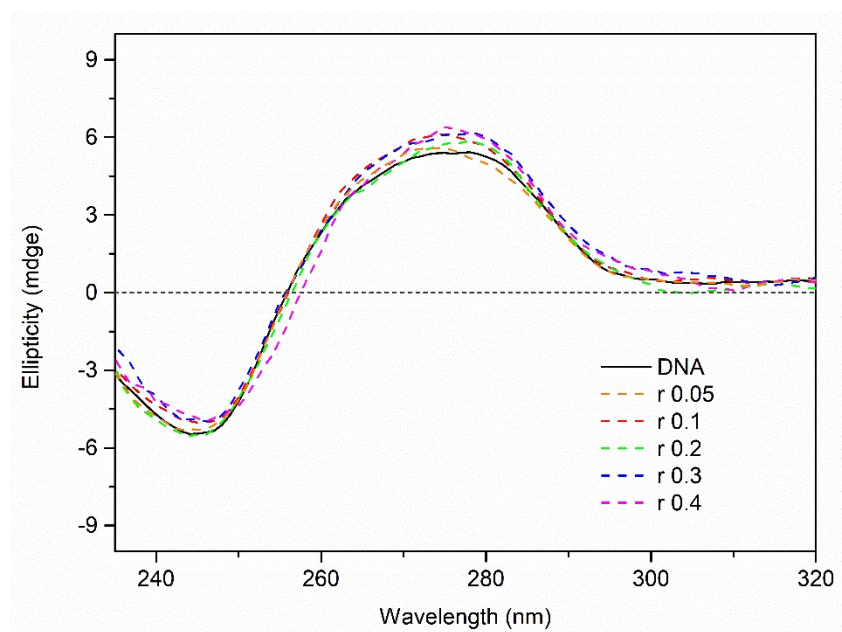

**Fig. S13.** CD spectrum of ct-DNA in the presence of **1**.  $r = [\text{complex } 1] / [\text{DNA}]$ .

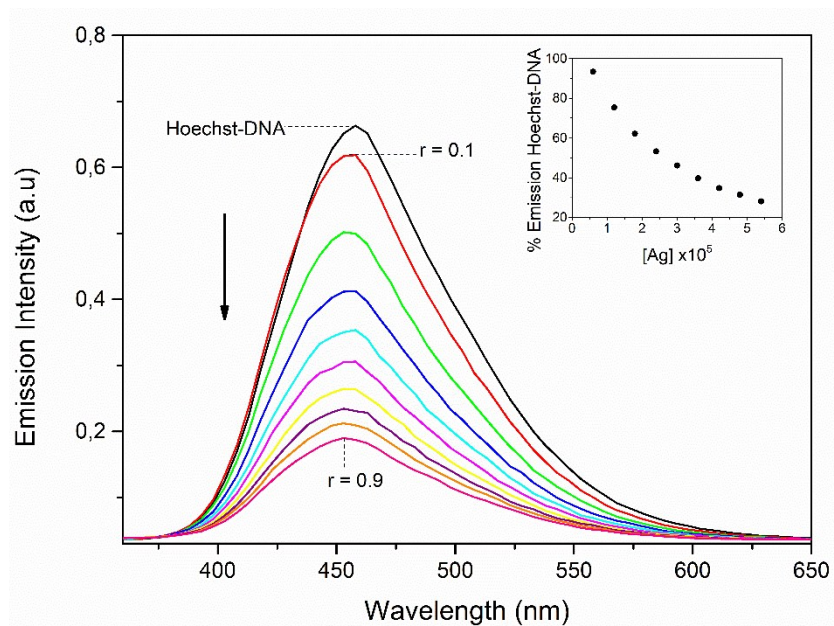

**Fig. S14.** Emission spectra of Hoechst-bound DNA ( $\lambda_{ex} = 350$  nm) in the presence of increasing concentrations of **1** (6 - 60  $\mu$ M) in Tris-HCl buffer. [DNA] = 60  $\mu$ M; [TO] = 6  $\mu$ M. Inset: plot [Ag] vs relative emission of Hoechst-bound DNA.

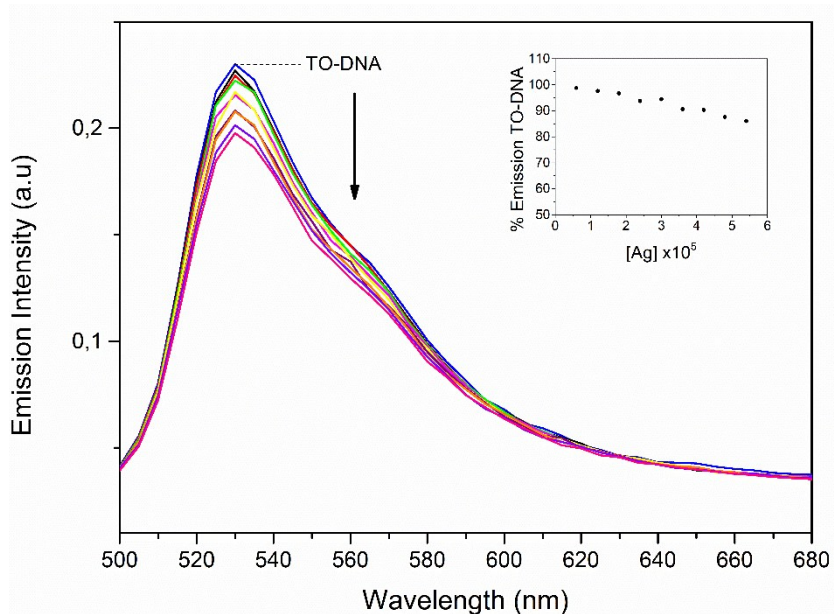

**Fig. S15.** Emission spectra of TO-bound DNA ( $\lambda_{ex} = 480$  nm) in the presence of increasing concentrations of **1** (6 - 60  $\mu$ M) in Tris-HCl buffer. [DNA] = 60  $\mu$ M; [TO] = 6  $\mu$ M. Inset: plot [Ag] vs relative emission of TO-bound DNA.

**Table S2.** Instrumental parameters and temperature program used in the determination of Ag in cell suspension by HR-CS GFAAS.

| Wavelength (nm)                       | 328.0683     |            |                             |          |
|---------------------------------------|--------------|------------|-----------------------------|----------|
| Read time (s)                         | 5            |            |                             |          |
| Integration mode of absorbance signal | Area         |            |                             |          |
| Evaluation pixels                     | 3 (CP ± 1)   |            |                             |          |
| Purge gas                             | Argon        |            |                             |          |
| Gas flow during atomization           | Stop         |            |                             |          |
| Working range (pg)                    | 0 – 500      |            |                             |          |
| Step                                  | Name         | Temp. (°C) | Ramp. (°C s <sup>-1</sup> ) | Hold (s) |
| 1                                     | Drying       | 125        | 7                           | 30       |
| 2                                     | Pyrolysis    | 800        | 60                          | 35       |
| 3                                     | Gas adaption | 800        | 0                           | 5        |
| 4                                     | Atomize      | 1800       | 1500                        | 5        |
| 5                                     | Clean        | 2600       | 1000                        | 3        |

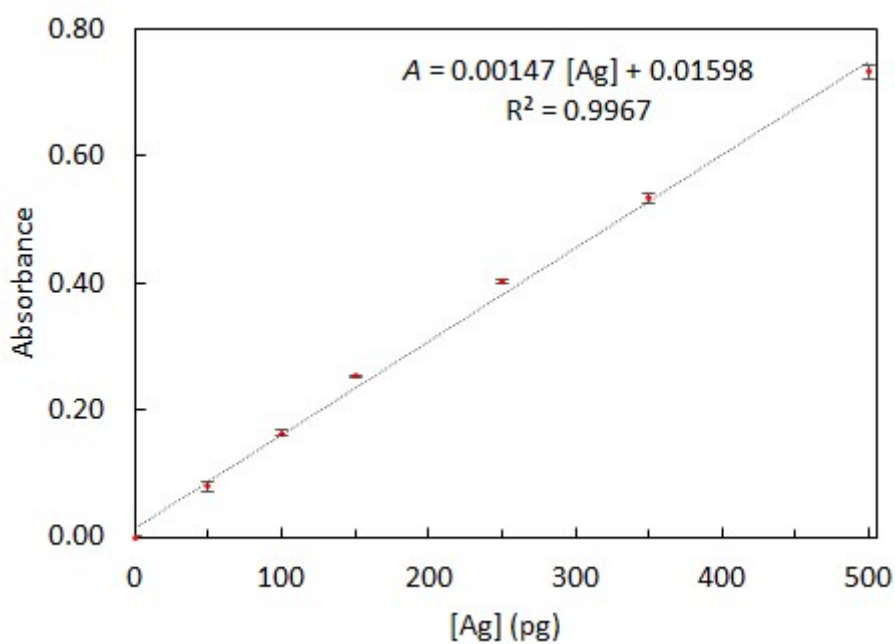

**Fig. S16.** Calibration curve obtained for Ag determination by HR-CS GFAAS.

**Table S3.** Percentage of Ag uptake in the cells determined by HR-CS GFAAS (n = 3).

| Sample | [Ag]<br>(pg) | Initial concentration<br>(pg) | Uptake percentage<br>(%) |
|--------|--------------|-------------------------------|--------------------------|
| 1      | 714.8 ± 132  | 6010.7 ± 489.6                | 11.9                     |
|        | 730.7 ± 170  |                               | 12.2                     |
|        | 784.6 ± 224  |                               | 13.1                     |
| 2      | 490.6 ± 116  | 6318.8 ± 168.9                | 7.8                      |
|        | 497.4 ± 121  |                               | 7.9                      |
|        | 415.2 ± 35   |                               | 6.6                      |
| 3      | 1991.7 ± 240 | 9235.2 ± 779.1                | 21.6                     |
|        | 1841.5 ± 220 |                               | 19.9                     |
|        | 1139.0 ± 208 |                               | 12.3                     |
